# Supplementary material for: A time-insensitive colorimetric sensor for the determination of total protein
Source: Royal Society of Chemistry journal article supplement (doi:10.1039/c5ra25234b), 2016-01-01
Supplement: c5ra25234b1.pdf [file c5ra25234b1.pdf]

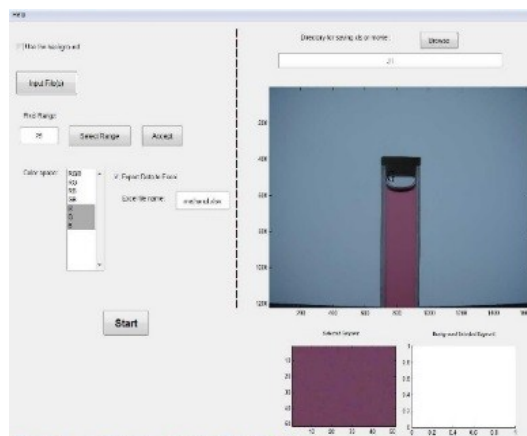

**Figure S1.** Photograph of the software written (in MATLAB) for image analysis

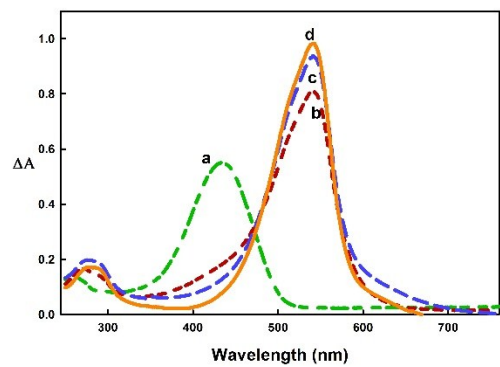

a: pH=5, b: pH=7.4, c: pH=8, d: pH=9.3

**Figure S2.** Changes in the absorbance spectra of the studied dye at different pH media
